# Supplementary material for: Metabolomic and Biochemical Analysis of Two Potato (Solanum tuberosum L.) Cultivars Exposed to In Vitro Osmotic and Salt Stresses
Source: PubMed Central journal article supplement (PMC7825055; doi:10.3390/plants10010098), 2021-01-06
Supplement: plants-10-00098-s001.pdf [file plants-10-00098-s001.pdf]

Supplementary Tables and Figures

**Table S1:** Representing different metabolites in 'BARI- 41'

| <b>Treatments</b> | <b>Organic/Fatty acids</b>                                                                                                                                                                                                                                                                                   | <b>Alkanes</b>                                                              | <b>Amines</b>  |
|-------------------|--------------------------------------------------------------------------------------------------------------------------------------------------------------------------------------------------------------------------------------------------------------------------------------------------------------|-----------------------------------------------------------------------------|----------------|
| Control           | 6-Fluoro-2-trifluoromethylbenzoic acid, 3-fluorophenyl ester<br>Decanoic acid, 2-methyl-<br>6-Octadecenoic acid, methyl ester, (Z)-<br>Hexadecanoic acid, 15-methyl-, methyl ester                                                                                                                           | Undecane                                                                    | norepinephrine |
| LiCl (20 mM)      | 2-Methylheptanoic acid<br>Cyclobutanecarboxylic acid, 1-cyclopentylethyl ester<br>Butanoic acid, methyl ester                                                                                                                                                                                                | Nonane, 4,5-dimethyl-<br>Butane, 2,2-dimethyl-                              | Norepinephrine |
| Mannitol (150 mM) | 6-Fluoro-2-trifluoromethylbenzoic acid, 3-fluorophenyl ester<br>Phthalic acid, cyclobutyl tridecyl ester<br>2-Methoxybenzoic acid, 2,3-dichlorophenyl ester<br>Decanoic acid, 2-methyl-<br>9-Octadecenoic acid (Z)-, methyl ester<br>Tridecanoic acid, methyl ester<br>Benzoic acid, 4-methyl-, phenyl ester | Nonane, 4,5-dimethyl-<br>Decane, 3,7-dimethyl-<br>Butane, 2-bromo-2-methyl- | norepinephrine |

**Table S2:** Representing different metabolites in 'BARI-41'

| <b>Treatments</b> | <b>Fatty Alcohol</b>                                        | <b>Miscellaneous</b>                                                                                                                                       |
|-------------------|-------------------------------------------------------------|------------------------------------------------------------------------------------------------------------------------------------------------------------|
| Control           | n-Tridecan-1-ol                                             | Cyclohexasiloxane, dodecamethyl-<br>Trisiloxane, 1,1,1,5,5,5-hexamethyl-3,3-bis[(trimethylsilyl)oxy]-<br>1-Undecyne                                        |
| LiCl (20 mM)      | (S)-(+)-5-Methyl-1-heptanol<br>(SS)- or (RR)-2,3-hexanediol | Cyclohexasiloxane, dodecamethyl-<br>Cycloheptasiloxane, tetradecamethyl-                                                                                   |
| Mannitol (150 mM) | (S)-(+)-5-Methyl-1-heptanol<br>(SS)- or (RR)-2,3-hexanediol | Cyclohexasiloxane, dodecamethyl-<br>Cycloheptasiloxane, tetradecamethyl-<br>1,3-Dioxolane, 2-(1-bromoethyl)-<br>1,1'-Bicyclopropyl, 2,2,2',2'-tetramethyl- |

**Table S3:** Representing different metabolites in 'Spunta'

| <b>Treatment</b> | <b>Organic/Fatty acids</b>                                                                                                                                                                                                                                                                                    | <b>Amines</b>                                           | <b>Fatty Alcohol</b>                                                                                           |
|------------------|---------------------------------------------------------------------------------------------------------------------------------------------------------------------------------------------------------------------------------------------------------------------------------------------------------------|---------------------------------------------------------|----------------------------------------------------------------------------------------------------------------|
| Control          | 6-Octadecenoic acid, methyl ester, (Z)-<br><br>Hexadecanoic acid, 15-methyl-, methyl ester                                                                                                                                                                                                                    | norepinephrine<br>Furazano[3,4-b]pyrazin-5-ol, 6-amino- | 1-Undecanol                                                                                                    |
| LiCl (20 mM)     | Trichloroacetic acid, undecyl ester<br>Tridecanoic acid, methyl ester<br>9,12,15-Octadecatrienoic acid, 2,3-dihydroxypropyl ester, (Z,Z,Z)-<br>Tetradecanoic acid, 12-methyl-, methyl ester, (S)-<br>Hexanedioic acid, mono(2-ethylhexyl)ester<br>Tridecanedioic acid, dimethyl ester<br>Diisooctyl phthalate | Tryptamine<br><br><br><br>norepinephrine                | N-tridecanol<br>1-Dodecanol<br><br><br><br><br><br>(S)-(+)-5-Methyl-1-heptanol<br>(SS)- or (RR)-2,3-hexanediol |

|                   |                                                                                                                                                                       |                              |                                                                                    |
|-------------------|-----------------------------------------------------------------------------------------------------------------------------------------------------------------------|------------------------------|------------------------------------------------------------------------------------|
| Mannitol (150 mM) | Tridecanoic acid, methyl ester<br>17-Octadecynoic acid, methyl ester<br>Hexanedioic acid, bis(2-ethylhexyl) ester<br>Acetic acid, cesium salt<br>Diisooctyl phthalate | Ethyl aminomethylformimidate | Nonane, 1-iodo-<br>4,4-Dimethyl-2-pentanol,<br>trimethylsilyl ether<br>4-Dodecanol |
|-------------------|-----------------------------------------------------------------------------------------------------------------------------------------------------------------------|------------------------------|------------------------------------------------------------------------------------|

**Table S4:** Representing different metabolites in 'Spunta'

| Treatment         | Miscellaneous                                                                                                                                                                                                                                                            | Sugars    | Terpenes             |
|-------------------|--------------------------------------------------------------------------------------------------------------------------------------------------------------------------------------------------------------------------------------------------------------------------|-----------|----------------------|
| Control           | Cyclohexasiloxane, dodecamethyl-<br>Cycloheptasiloxane, tetradecamethyl-<br>Undecane<br>Decane, 3,7-dimethyl-                                                                                                                                                            |           |                      |
| LiCl (20 mM)      | Trisiloxane, 1,1,1,5,5,5-hexamethyl-3,3-bis[(trimethylsilyl)oxy]-<br>Cyclohexanol, 5-methyl-2-(1-methylethyl)-, [1S-(1.alpha.,2.beta.,5.beta.)]-<br>Nonane, 4,5-dimethyl-                                                                                                | Trehalose | Bicyclo[5.3.0]decane |
| Mannitol (150 mM) | Cyclohexasiloxane, dodecamethyl-<br>Trisiloxane, 1,1,1,5,5,5-hexamethyl-3,3-bis[(trimethylsilyl)oxy]-<br>Silane, [(1,1-dimethyl-2-propenyl)oxy]dimethyl-<br>4H-Pyran-4-one<br>3,4-Dimethyl-1-dimethyl(trimethylsilylmethyl) silyloxycyclohexane<br>Nonane, 4,5-dimethyl- |           |                      |

**Table S5:** Metabolites detected in shoots

| Compounds                                                                                                                        | 'BARI-41' |               |                    | 'Spunta' |                |                    |
|----------------------------------------------------------------------------------------------------------------------------------|-----------|---------------|--------------------|----------|----------------|--------------------|
|                                                                                                                                  | Control   | LiCl<br>20 mM | Mannitol<br>150 mM | Control  | LiCl<br>20 mM) | Mannitol<br>150 mM |
| Undecane                                                                                                                         | 497452    | 0             | 0                  | 464319   | 0              | 0                  |
| N-(Trifluoroacetyl)-N,O,O'-<br>tetrakis(trimethylsilyl)norepinephrine                                                            | 33340     | 18946         | 9202               | 20399    | 0              | 0                  |
| Cyclohexasiloxane, dodecamethyl-                                                                                                 | 40951     | 110517        | 54819              | 92309    | 0              | 47347              |
| Trisiloxane, 1,1,1,5,5,5-hexamethyl-3,3-bis[(trimethylsilyloxy)-<br>6-Fluoro-2-trifluoromethylbenzoic acid, 3-fluorophenyl ester | 34031     | 0             | 0                  | 0        | 36395          | 39232              |
| n-Tridecan-1-ol                                                                                                                  | 9362      | 0             | 4828               | 0        | 0              | 0                  |
| Decanoic acid, 2-methyl-                                                                                                         | 168079    | 0             | 0                  | 0        | 89703          | 0                  |
| 1-Undecyne                                                                                                                       | 76880     | 0             | 41994              | 0        | 0              | 0                  |
| 6-Octadecenoic acid, methyl ester, (Z)-                                                                                          | 12619     | 0             | 0                  | 0        | 0              | 0                  |
| Hexadecanoic acid, 15-methyl-, methyl ester                                                                                      | 68646     | 0             | 0                  | 54661    | 0              | 0                  |
| Furazano[3,4-b]pyrazin-5-ol, 6-amino-                                                                                            | 58901     | 0             | 0                  | 37909    | 0              | 0                  |
| Decane, 3,7-dimethyl-                                                                                                            | 0         | 0             | 0                  | 6956     | 0              | 0                  |
| Cycloheptasiloxane, tetradecamethyl-                                                                                             | 0         | 0             | 49538              | 37761    | 0              | 0                  |
| 1-Undecanol                                                                                                                      | 0         | 106222        | 53231              | 98721    | 0              | 0                  |
| Nonane, 4,5-dimethyl-                                                                                                            | 0         | 0             | 0                  | 71714    | 82503          | 0                  |
| Butane, 2,2-dimethyl-                                                                                                            | 0         | 145176        | 458644             | 0        | 460415         | 430874             |
| (S)-(+)-5-Methyl-1-heptanol                                                                                                      | 0         | 9526          | 0                  | 0        | 0              | 0                  |
| (SS)- or (RR)-2,3-hexanediol                                                                                                     | 0         | 45750         | 38949              | 0        | 0              | 0                  |
| 2-Methylheptanoic acid                                                                                                           | 0         | 5634          | 6599               | 0        | 0              | 0                  |
| Cyclobutanecarboxylic acid, 1-cyclopentylethyl ester                                                                             | 0         | 19725         | 0                  | 0        | 0              | 0                  |
| Butanoic acid, methyl ester                                                                                                      | 0         | 15880         | 0                  | 0        | 0              | 0                  |
| Phthalic acid, cyclobutyl tridecyl ester                                                                                         | 0         | 10909         | 0                  | 0        | 0              | 0                  |
| 2-Methoxybenzoic acid, 2,3-dichlorophenyl ester                                                                                  | 0         | 0             | 7536               | 0        | 0              | 0                  |
| 1,3-Dioxolane, 2-(1-bromoethyl)-                                                                                                 | 0         | 0             | 2065               | 0        | 0              | 0                  |
|                                                                                                                                  | 0         | 0             | 7666               | 0        | 0              | 0                  |

|                                                                             |   |   |       |   |         |       |
|-----------------------------------------------------------------------------|---|---|-------|---|---------|-------|
| 1,1'-Bicyclopropyl, 2,2,2',2'-tetramethyl-                                  | 0 | 0 | 18756 | 0 | 0       | 0     |
| 9-Octadecenoic acid (Z)-, methyl ester                                      | 0 | 0 | 51755 | 0 | 0       | 0     |
| Butane, 2-bromo-2-methyl-                                                   | 0 | 0 | 4821  | 0 | 0       | 0     |
| Tridecanoic acid, methyl ester                                              | 0 | 0 | 25987 | 0 | 54120   | 35338 |
| Benzoic acid, 4-methyl-, phenyl ester                                       | 0 | 0 | 11695 | 0 | 0       | 0     |
| Trehalose                                                                   | 0 | 0 | 0     | 0 | 1475711 | 0     |
| Trichloroacetic acid, undecyl ester                                         | 0 | 0 | 0     | 0 | 147878  | 0     |
| Tryptamine                                                                  | 0 | 0 | 0     | 0 | 42685   | 0     |
| 1-Dodecanol                                                                 | 0 | 0 | 0     | 0 | 82503   | 0     |
| Bicyclo[5.3.0]decane                                                        | 0 | 0 | 0     | 0 | 64316   | 0     |
| 9,12,15-Octadecatrienoic acid, 2,3-dihydroxypropyl ester, (Z,Z,Z)-          | 0 | 0 | 0     | 0 | 107307  | 0     |
| Cyclohexanol, 5-methyl-2-(1-methylethyl)-, [1S-(1.alpha.,2.beta.,5.beta.)]- | 0 | 0 | 0     | 0 | 49854   | 0     |
| Tetradecanoic acid, 12-methyl-, methyl ester, (S)-                          | 0 | 0 | 0     | 0 | 38564   | 0     |
| Hexanedioic acid, mono(2-ethylhexyl)ester                                   | 0 | 0 | 0     | 0 | 68447   | 0     |
| Tridecanedioic acid, dimethyl ester                                         | 0 | 0 | 0     | 0 | 42560   | 0     |
| Diisooctyl phthalate                                                        | 0 | 0 | 0     | 0 | 289982  | 59630 |
| Nonane, 1-iodo-                                                             | 0 | 0 | 0     | 0 | 0       | 33278 |
| Silane, [(1,1-dimethyl-2-propenyl)oxy]dimethyl-                             | 0 | 0 | 0     | 0 | 0       | 14058 |
| 4,4-Dimethyl-2-pentanol, trimethylsilyl ether                               | 0 | 0 | 0     | 0 | 0       | 14596 |
| 4-Dodecanol                                                                 | 0 | 0 | 0     | 0 | 0       | 23205 |
| 17-Octadecynoic acid, methyl ester                                          | 0 | 0 | 0     | 0 | 0       | 36054 |
| Ethyl aminomethylformimidate                                                | 0 | 0 | 0     | 0 | 0       | 19375 |
| Hexanedioic acid, bis(2-ethylhexyl) ester                                   | 0 | 0 | 0     | 0 | 0       | 15297 |
| 4H-Pyran-4-one                                                              | 0 | 0 | 0     | 0 | 0       | 14302 |
| Acetic acid, cesium salt                                                    | 0 | 0 | 0     | 0 | 0       | 26807 |
| 3,4-Dimethyl-1-dimethyl(trimethylsilylmethyl)silyloxycyclohexane            | 0 | 0 | 0     | 0 | 0       | 10199 |

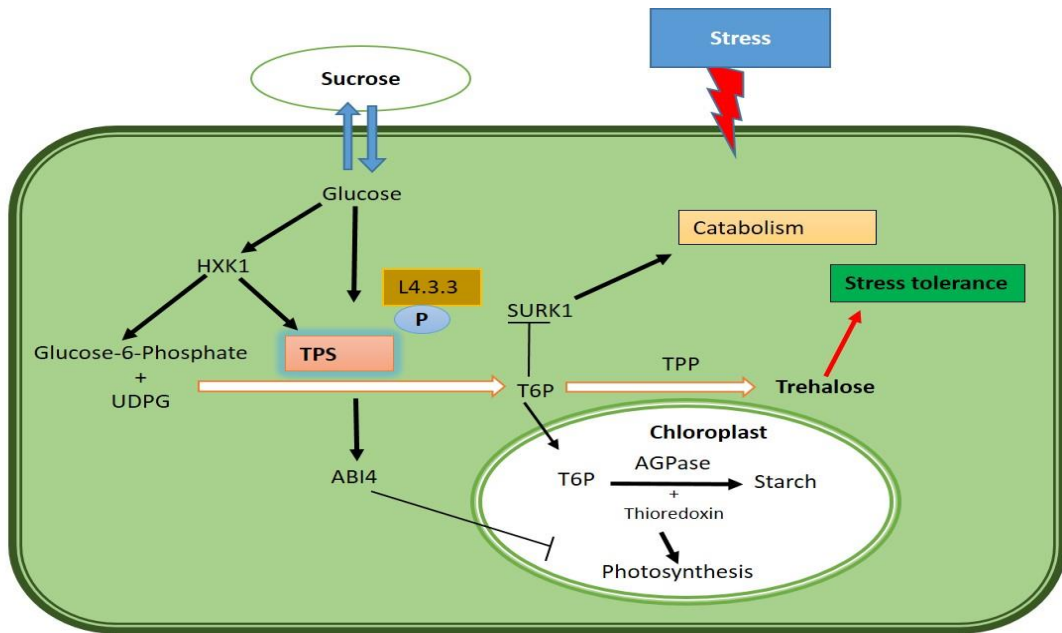

**Figure S1:** Trehalose pathway role in eukaryotes. Trehalose-6-phosphate (T6P) control sugar metabolism and plant development. Trehalose and glucose are also responsible for many signaling and regulatory pathways and integrate external cues to adapt cells to abiotic stress, growth and development The diagram is adapted from [103]. Metabolites detected in shoots

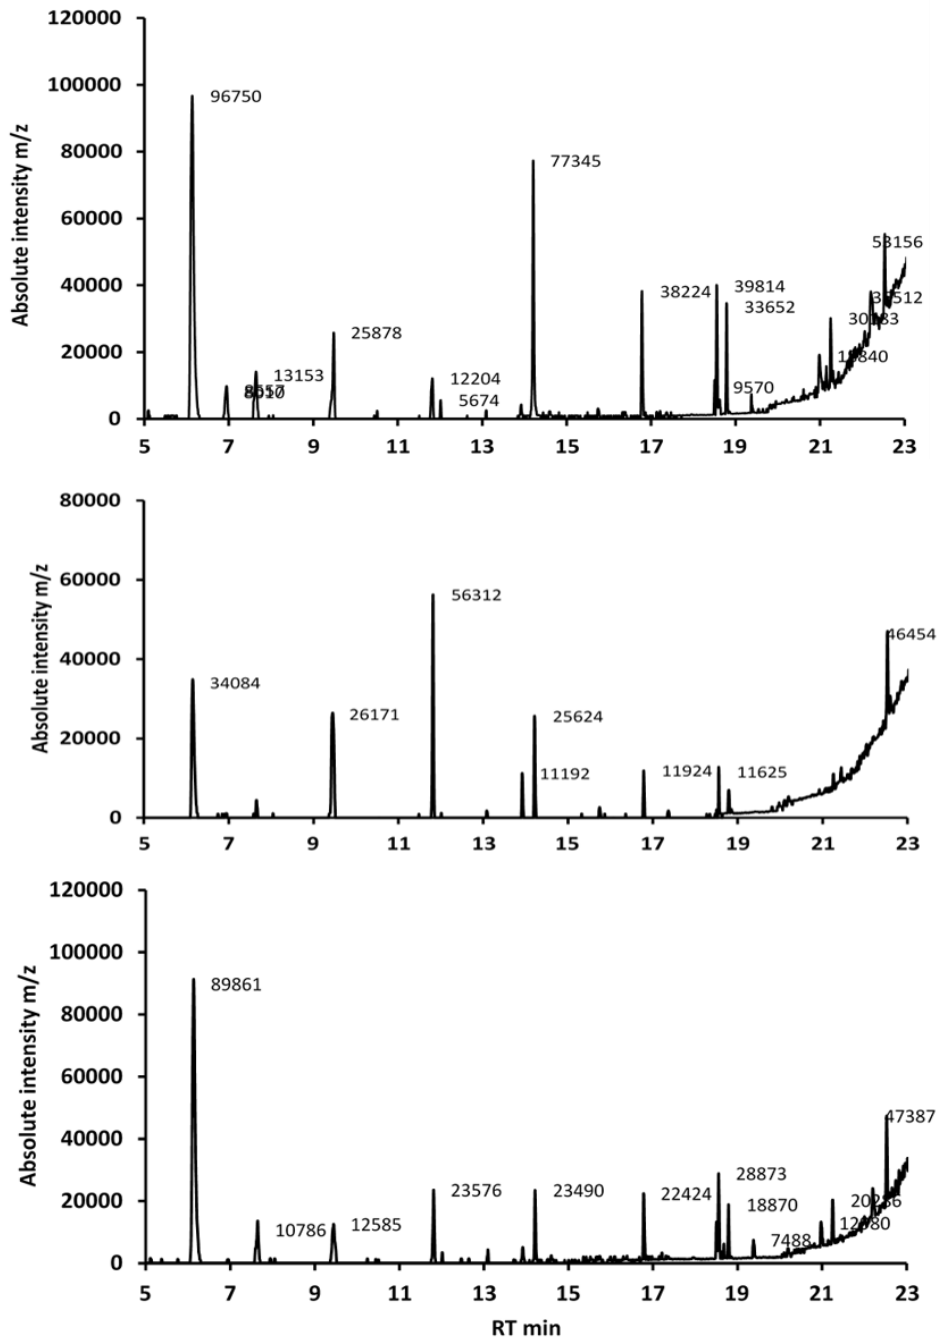

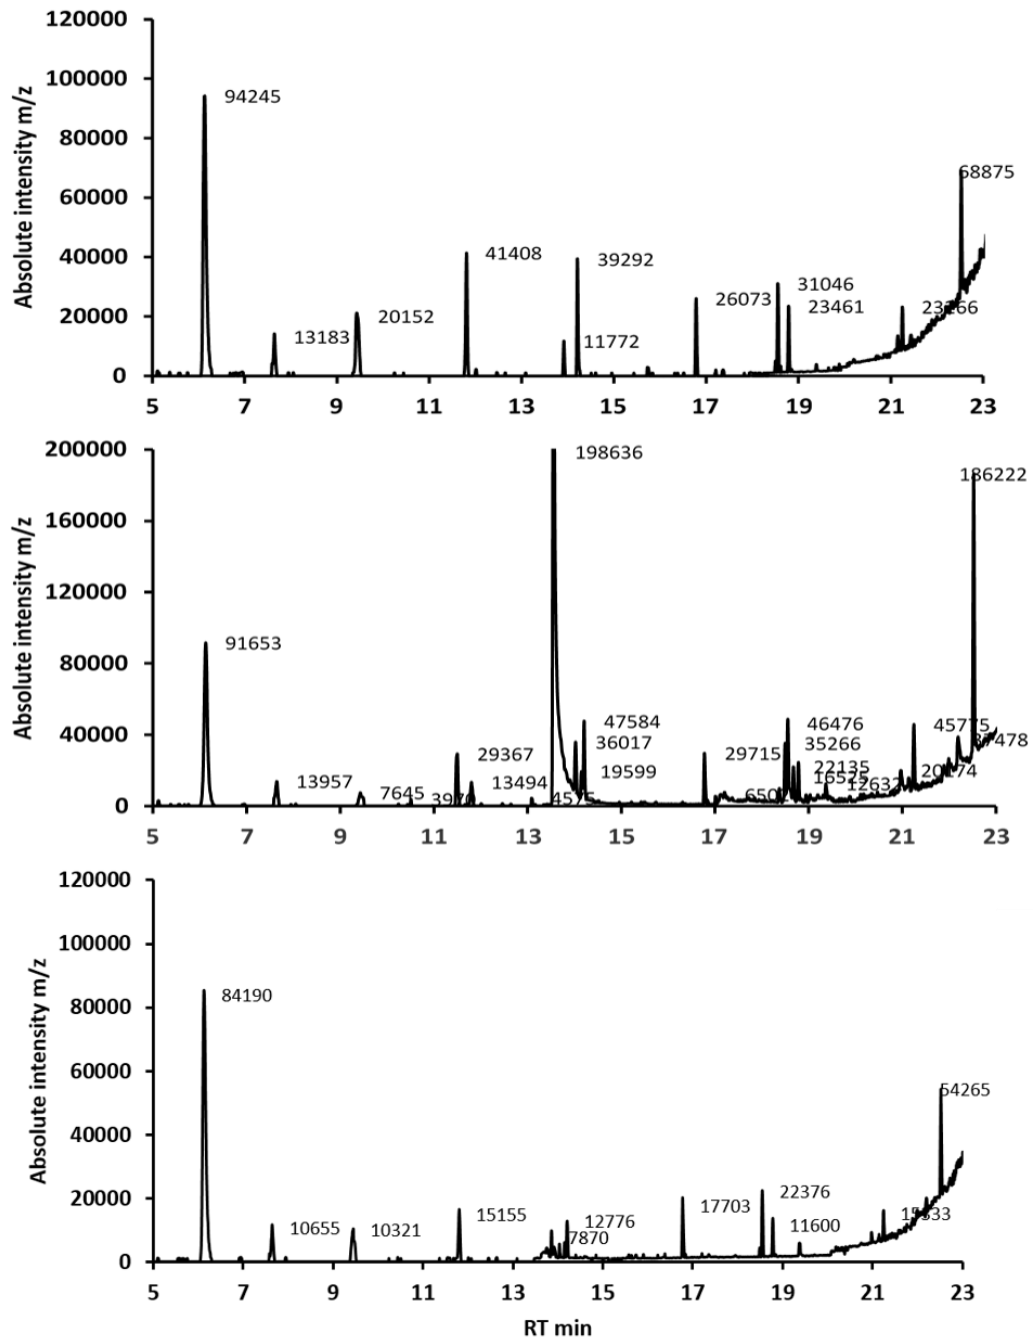

**Figure S3.** GC-MS chromatography absolute intensity readings of cv. 'Spunta'. Control (top), LiCl 20mM (middle), Mannitol 150 mM (bottom)
